# Supplementary material for: Facile synthesis of Co3O4 disordered circular sheets for selective electrochemical determination of nitrite
Source: Royal Society of Chemistry journal article supplement (doi:10.1039/c8nj02639d), 2018-01-01
Supplement: c8nj02639d1.pdf [file c8nj02639d1.pdf]

## **Facile Synthesis of $\text{Co}_3\text{O}_4$ Disordered Circular Sheet for Selective Electrochemical Determination of Nitrite**

**Velayutham Sudha <sup>a, b</sup>, Sanjib Anwesha Mohanty <sup>c</sup>, Rangasamy Thangamuthu <sup>a, b\*</sup>**

<sup>a</sup> Electrochemical Materials Science (ECMS) Division, CSIR-Central Electrochemical Research Institute (CECRI), Karaikudi-630 003, Tamil Nadu, India.

<sup>b</sup> Academy of Scientific and Innovative Research (AcSIR), CSIR-Central Electrochemical Research Institute, Karaikudi- 630 003, Tamilnadu, India.

<sup>c</sup> School of chemistry, Sambalpur university, Jyoti vihar, Sambalpur-768019, Odisha, India

\* To whom correspondence should be addressed. E-mail: [thangamuthu@cecri.res.in](mailto:thangamuthu@cecri.res.in); [thangamuthu\\_r@yahoo.co.uk](mailto:thangamuthu_r@yahoo.co.uk); Phone: +91-04565-241-350.

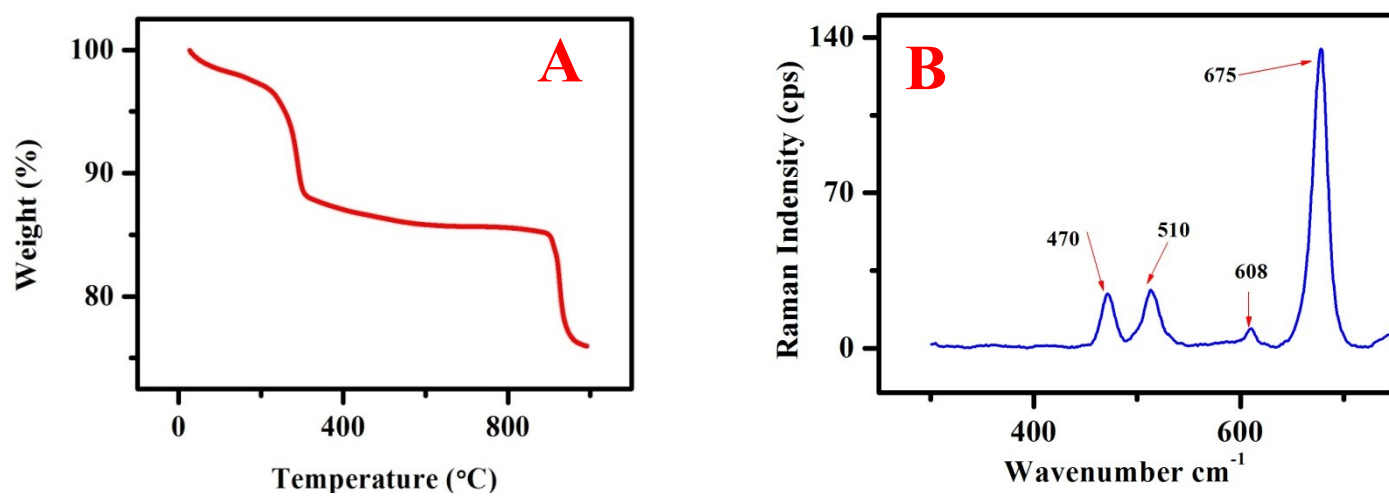

Fig.S1. TGA and Raman spectra of as-prepared  $\text{Co}_3\text{O}_4$ –DCS nanostructure.

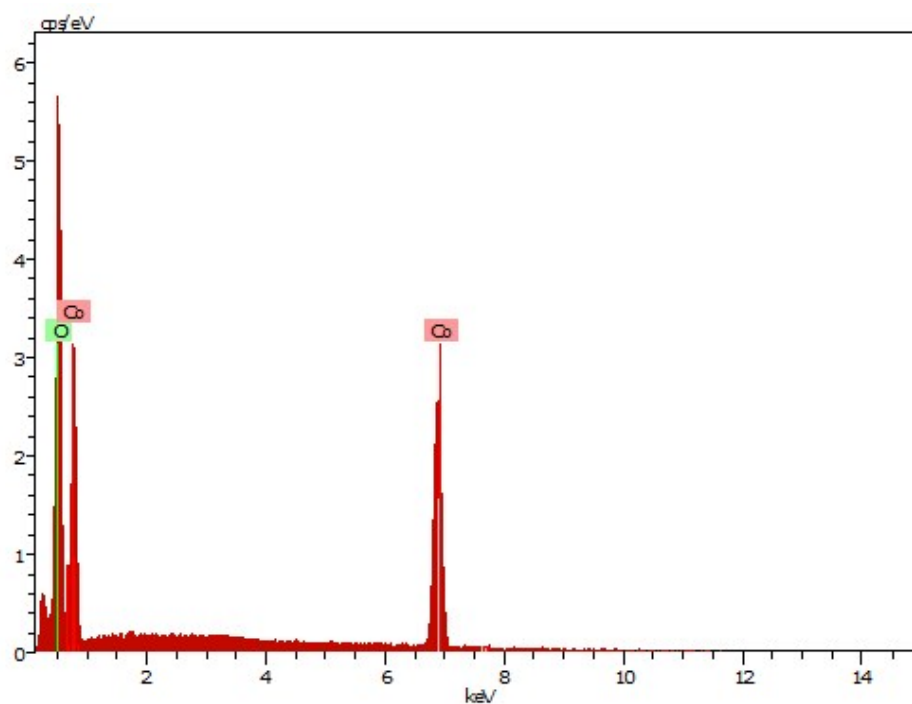

Fig.S2. EDAX analysis of  $\text{Co}_3\text{O}_4$  nanostructure.

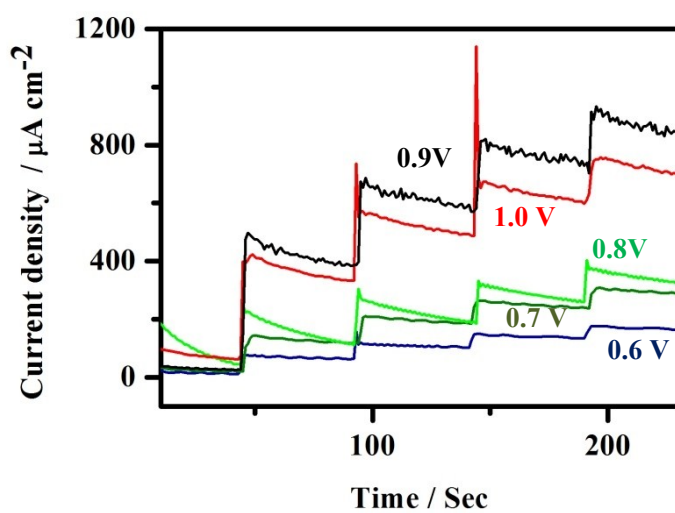

**Fig.S3 (A).** Amperometric response of Co<sub>3</sub>O<sub>4</sub>-DSC at different potential from (0.6 to 1.0 V) upon successive addition of 1 mM of NO<sub>2</sub><sup>-</sup>.
